# Supplementary material for: A Marine Bacterium with Animal-Pathogen-Like Type III Secretion Elicits the Nonhost Hypersensitive Response in a Land Plant
Source: PubMed Central journal article supplement — Plant Pathol J. 2023 Dec 1;39(6):584–91. doi: 10.5423/PPJ.FT.09.2023.0125 (PMC10721388; doi:10.5423/ppj.ft.09.2023.0125), 2023-12-01
Supplement: ppj-ft-09-2023-0125-Supplementary-Table-1.pdf [file ppj-ft-09-2023-0125-Supplementary-Table-1.pdf]

**Supplementary Table 1.** Primer sequences used in this study

| Target gene    | Sequence (5' to 3')                                 | Note                                                                           |
|----------------|-----------------------------------------------------|--------------------------------------------------------------------------------|
| <i>avrPto1</i> | AATGGGAAATATATGTGTCTGGCG<br>CATCATTGCCAGTTACGGTACGG | Confirmation of <i>Hahella chejuensis</i> pPTE6:: <i>AvrPto1</i> transformants |
| <i>hctC1</i>   | TCGCTCTGTTGCTGACATTG<br>GATTCACCGTTGGCGTACAA        | Gene expression profiling                                                      |
| <i>hctC2</i>   | CTCAGCTACGCCATTATGC<br>CCACGCCCTGAACTTTATCG         | Gene expression profiling                                                      |
| <i>hopN1</i>   | GCATGTTCAATTGCCGGAGA<br>GGGTAACGGCTTCATTCGTG        | Gene expression profiling                                                      |
| <i>hopN2</i>   | GACCTGAGCAAACGCAAGAT<br>CTTTGGCGGGATCATTCTGG        | Gene expression profiling                                                      |
| <i>hctO1</i>   | CGCCTGAAGGAAGTCTCACT<br>CACTTCTCTACGGCTTTGCC        | Gene expression profiling                                                      |
| <i>hctO2</i>   | GCCATTCTGGCCGAAGATTT<br>CAAACCTGAAACCCGCCGTAG       | Gene expression profiling                                                      |
| <i>hctV1</i>   | CTGGTGGATGTCATGATCGC<br>CAGCAGCATGGATGGAAACA        | Gene expression profiling                                                      |
| <i>hctV2</i>   | CCTGAACCAGACCCTGCAAT<br>AGACGAAACAGGGTGGTGAT        | Gene expression profiling                                                      |
| <i>rpoA</i>    | TGGCTAGCGATATCCAGCTT<br>CCACGAGCCACTTTCAGTTT        | Gene expression profiling                                                      |
| <i>NbPR-1a</i> | AATATCCCACTCTTGCCG<br>CCTGGAGGATCATAGTTG            | Examination of <i>Nicotiana benthamiana</i> defense response                   |
| <i>NbActin</i> | TGGACTCTGGTGATGGTGTC<br>CCTCCAATCCAACACTGTA         | Examination of <i>N. benthamiana</i> defense response                          |
